# Supplementary material for: Extracellular HMGB1 blockade inhibits tumor growth through profoundly remodeling immune microenvironment and enhances checkpoint inhibitor-based immunotherapy
Source: PubMed Central journal article supplement — J Immunother Cancer. 2021 Mar 12;9(3):e001966. doi: 10.1136/jitc-2020-001966 (PMC7959241; doi:10.1136/jitc-2020-001966), 2021-03-12
Supplement: jitc-2020-001966supp001.pdf [file jitc-2020-001966supp001.pdf]

**Supplementary Table 1.** Demographic and patient characteristics according to HMGB1 cellular localization

| Characteristics            | Cytoplasmic anti-HMGB1 immunoreactivity |                 |                | P value |
|----------------------------|-----------------------------------------|-----------------|----------------|---------|
|                            | negative<br>(n=72)                      | 0-10%<br>(n=61) | >10%<br>(n=39) |         |
| <b>Age at diagnosis</b>    |                                         |                 |                | 0.7883  |
| ≤40                        | 12 (16.7%)                              | 11 (18%)        | 7 (17.9%)      |         |
| 40-65                      | 35 (48.6%)                              | 32 (52.5%)      | 23 (59%)       |         |
| ≥65                        | 25 (34.7%)                              | 18 (29.5%)      | 9 (23.1%)      |         |
| <b>TNM</b>                 |                                         |                 |                |         |
| <b>T</b>                   |                                         |                 |                | 0.4507  |
| T1                         | 33 (45.8%)                              | 33 (54.1%)      | 15 (38.5%)     |         |
| T2                         | 33 (45.8%)                              | 20 (32.8%)      | 20 (51.3%)     |         |
| T3                         | 4 (5.6%)                                | 6 (9.8%)        | 4 (10.2%)      |         |
| T4                         | 2 (2.8%)                                | 2 (3.3%)        | 0 (0%)         |         |
| <b>N</b>                   |                                         |                 |                | 0.6583  |
| N-                         | 46 (63.9%)                              | 35 (57.4%)      | 22 (56.4%)     |         |
| N+                         | 26 (36.1%)                              | 26 (42.6%)      | 17 (43.6%)     |         |
| <b>M</b>                   |                                         |                 |                | /       |
| M- or Mx                   | 72 (100%)                               | 61 (100%)       | 39 (100%)      |         |
| M+                         | 0 (0%)                                  | 0 (0%)          | 0 (0%)         |         |
| <b>Tumor stage (UICC)</b>  |                                         |                 |                | 0.5173  |
| Stage I                    | 25 (34.7%)                              | 22 (36.1%)      | 11 (28.2%)     |         |
| Stage II                   | 35 (48.6%)                              | 27 (44.2%)      | 24 (61.6%)     |         |
| Stage III                  | 12 (16.7%)                              | 12 (19.7%)      | 4 (10.2%)      |         |
| Stage IV                   | 0 (0%)                                  | 0 (0%)          | 0 (0%)         |         |
| <b>Proliferative index</b> |                                         |                 |                | 0.8635  |
| ≤25%                       | 25 (34.7%)                              | 17 (27.9%)      | 9 (23.1%)      |         |
| 26-50%                     | 18 (25%)                                | 16 (26.2%)      | 12 (30.8%)     |         |
| 51-75%                     | 16 (22.2%)                              | 13 (21.3%)      | 8 (20.5%)      |         |
| ≥75%                       | 13 (18.1%)                              | 15 (24.6%)      | 10 (25.6%)     |         |
| <b>Treatment</b>           |                                         |                 |                | 0.6919  |
| Radiotherapy               | 7 (9.7%)                                | 10 (16.4%)      | 5 (12.8%)      |         |
| Chemotherapy               | 24 (33.3%)                              | 18 (29.5%)      | 15 (38.5%)     |         |
| Chemoradiotherapy          | 33 (45.8%)                              | 30 (49.2%)      | 17 (43.5%)     |         |
| None                       | 6 (8.4%)                                | 1 (1.6%)        | 1 (2.6%)       |         |
| Unknown                    | 2 (2.8%)                                | 2 (3.3%)        | 1 (2.6%)       |         |
