# Supplementary material for: Extracellular HMGB1 blockade inhibits tumor growth through profoundly remodeling immune microenvironment and enhances checkpoint inhibitor-based immunotherapy
Source: PubMed Central journal article supplement — J Immunother Cancer. 2021 Mar 12;9(3):e001966. doi: 10.1136/jitc-2020-001966 (PMC7959241; doi:10.1136/jitc-2020-001966), 2021-03-12
Supplement: jitc-2020-001966supp002.pdf [file jitc-2020-001966supp002.pdf]

**Supplementary Table 2.** List of fluorochrome-conjugated antibodies used in this study.

| <b>Anti-mouse antibody</b> | <b>Fluorochrome</b> | <b>Clone</b> | <b>Company</b> |
|----------------------------|---------------------|--------------|----------------|
| CD3                        | FITC                | 17A2         | eBioscience    |
| CD19                       | FITC                | 6D5          | Biolegend      |
| CD11c                      | FITC                | N418         | Biolegend      |
| CD86                       | Pacific Blue        | GL-1         | Biolegend      |
| CD40                       | Pacific Blue        | 3/23         | Biolegend      |
| IA/IE                      | Pacific Blue        | M5/114.15.2  | Biolegend      |
| FoxP3                      | PE                  | NRPF-30      | eBioscience    |
| ICOSL                      | PE                  | HK5.3        | Biolegend      |
| BST2                       | PE                  | 129c1        | Biolegend      |
| ILT3                       | PE                  | H1.1         | Biolegend      |
| F4/80                      | PE                  | BM8          | eBioscience    |
| Ly6C                       | PE                  | HK1.4        | Biolegend      |
| CD25                       | APC                 | PC61.5       | eBioscience    |
| Siglec H                   | APC                 | 551          | Biolegend      |
| CD206                      | APC                 | C68C2        | Biolegend      |
| NKp46                      | APC                 | 29A1.4       | Biolegend      |
| CD80                       | PerCP/Cy5.5         | 16-10A1      | Biolegend      |
| Ly6G                       | PerCP/Cy5.5         | 1A8          | Biolegend      |
| CD8a                       | PerCP/Cy5.5         | 53-6-7       | eBioscience    |
| CD11b                      | PE/Cy7              | M1/70        | Biolegend      |
| CD45                       | APC/Cy7             | 30-F11       | Biolegend      |
| PD-L1                      | PE/Cy7              | MI-5         | eBioscience    |
| PD-1                       | PE/Cy7              | RMPI-31      | Biolegend      |
| BST2                       | PE/Cy7              | eBio927      | eBioscience    |
| IA/IE                      | V500                | M5/114.15.2  | BD Biosciences |
| Siglec F                   | Alexa Fluor 647     | E50-2440     | BD Biosciences |
| CD4                        | eFluor450           | GK1.5        | eBioscience    |
| CD11b                      | eFluor450           | M1/70        | eBioscience    |
| CD16/CD32                  | -                   | 2.4G2        | BD Biosciences |

---

| <b>Anti-human antibody</b> | <b>Fluorochrome</b> | <b>Clone</b> | <b>Company</b>    |
|----------------------------|---------------------|--------------|-------------------|
| CD40                       | PE                  | 5C3          | BD Biosciences    |
| CD80                       | PE                  | 2D10.4       | eBioscience       |
| CD83                       | PE                  | HB15e        | BD Biosciences    |
| CD86                       | PE                  | 2331         | BD Biosciences    |
| HLA-DR                     | PE                  | MEM-15       | Thermo Scientific |
| HLA-ABC                    | PE                  | W6/32        | eBioscience       |
| CCR7                       | PE                  | 150503       | BD Biosciences    |
| CD123                      | FITC                | AC145        | Miltenyi          |
| CD1a                       | FITC                | NA1/34-HLK   | Invitrogen        |
