# Supplementary material for: Extracellular HMGB1 blockade inhibits tumor growth through profoundly remodeling immune microenvironment and enhances checkpoint inhibitor-based immunotherapy
Source: PubMed Central journal article supplement — J Immunother Cancer. 2021 Mar 12;9(3):e001966. doi: 10.1136/jitc-2020-001966 (PMC7959241; doi:10.1136/jitc-2020-001966), 2021-03-12

## A $\alpha$ PD-1 + HMGB1 inhibitors (individual data related to Figure 4D)

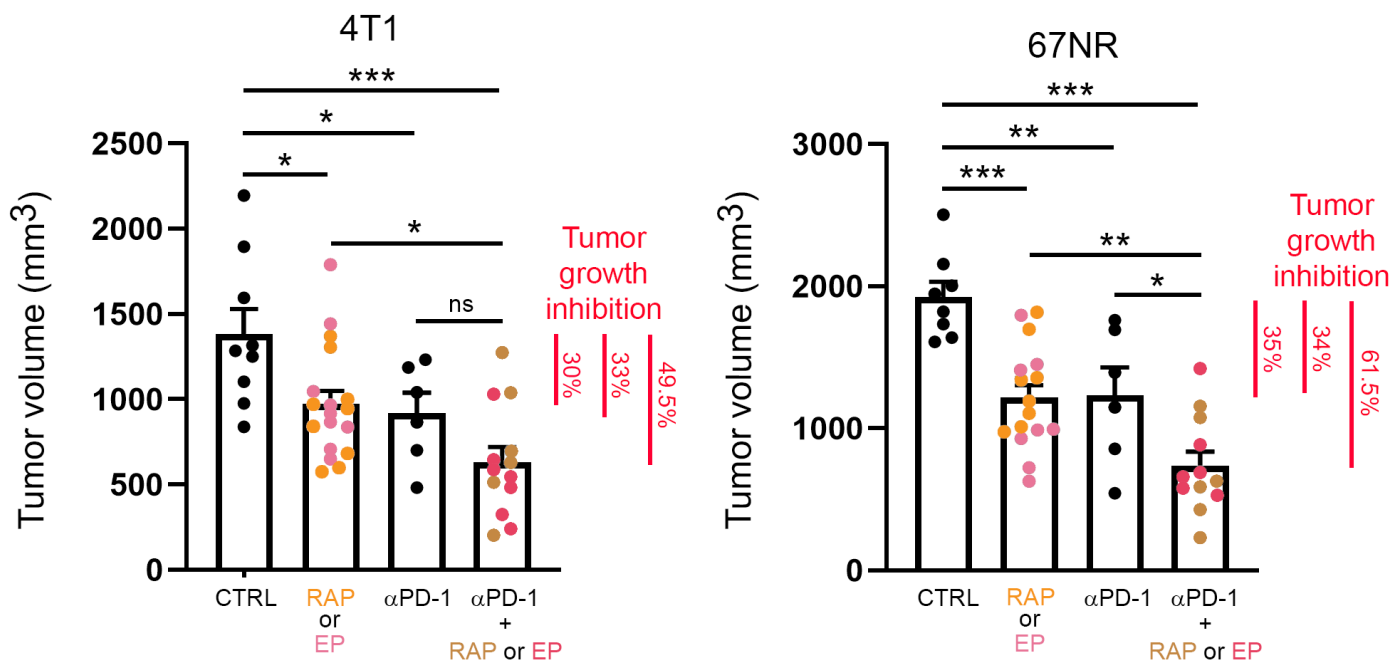

## B $\alpha$ PD-L1 + HMGB1 inhibitors (individual data related to Figure 5F)

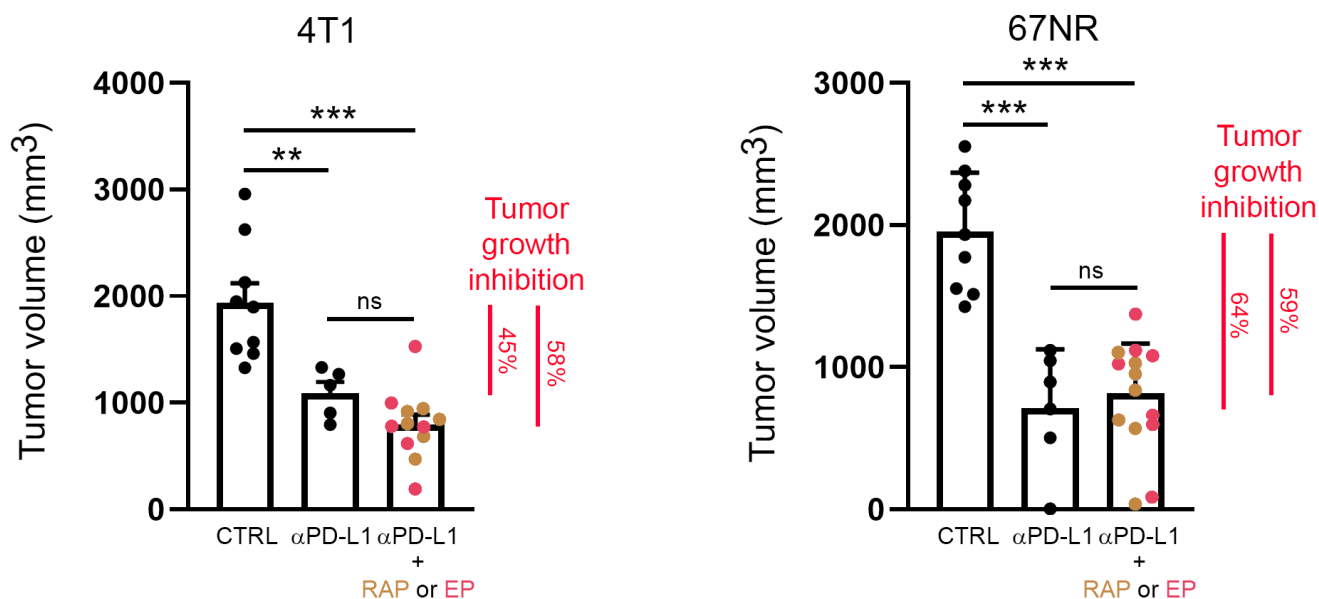

Supplement: jitc-2020-001966supp012.pdf [file jitc-2020-001966supp012.pdf]
