# Supplementary figures and images for: Extracellular HMGB1 blockade inhibits tumor growth through profoundly remodeling immune microenvironment and enhances checkpoint inhibitor-based immunotherapy
Source: PubMed Central journal article supplement — J Immunother Cancer. 2021 Mar 12;9(3):e001966. doi: 10.1136/jitc-2020-001966 (PMC7959241; doi:10.1136/jitc-2020-001966), 2021-03-12

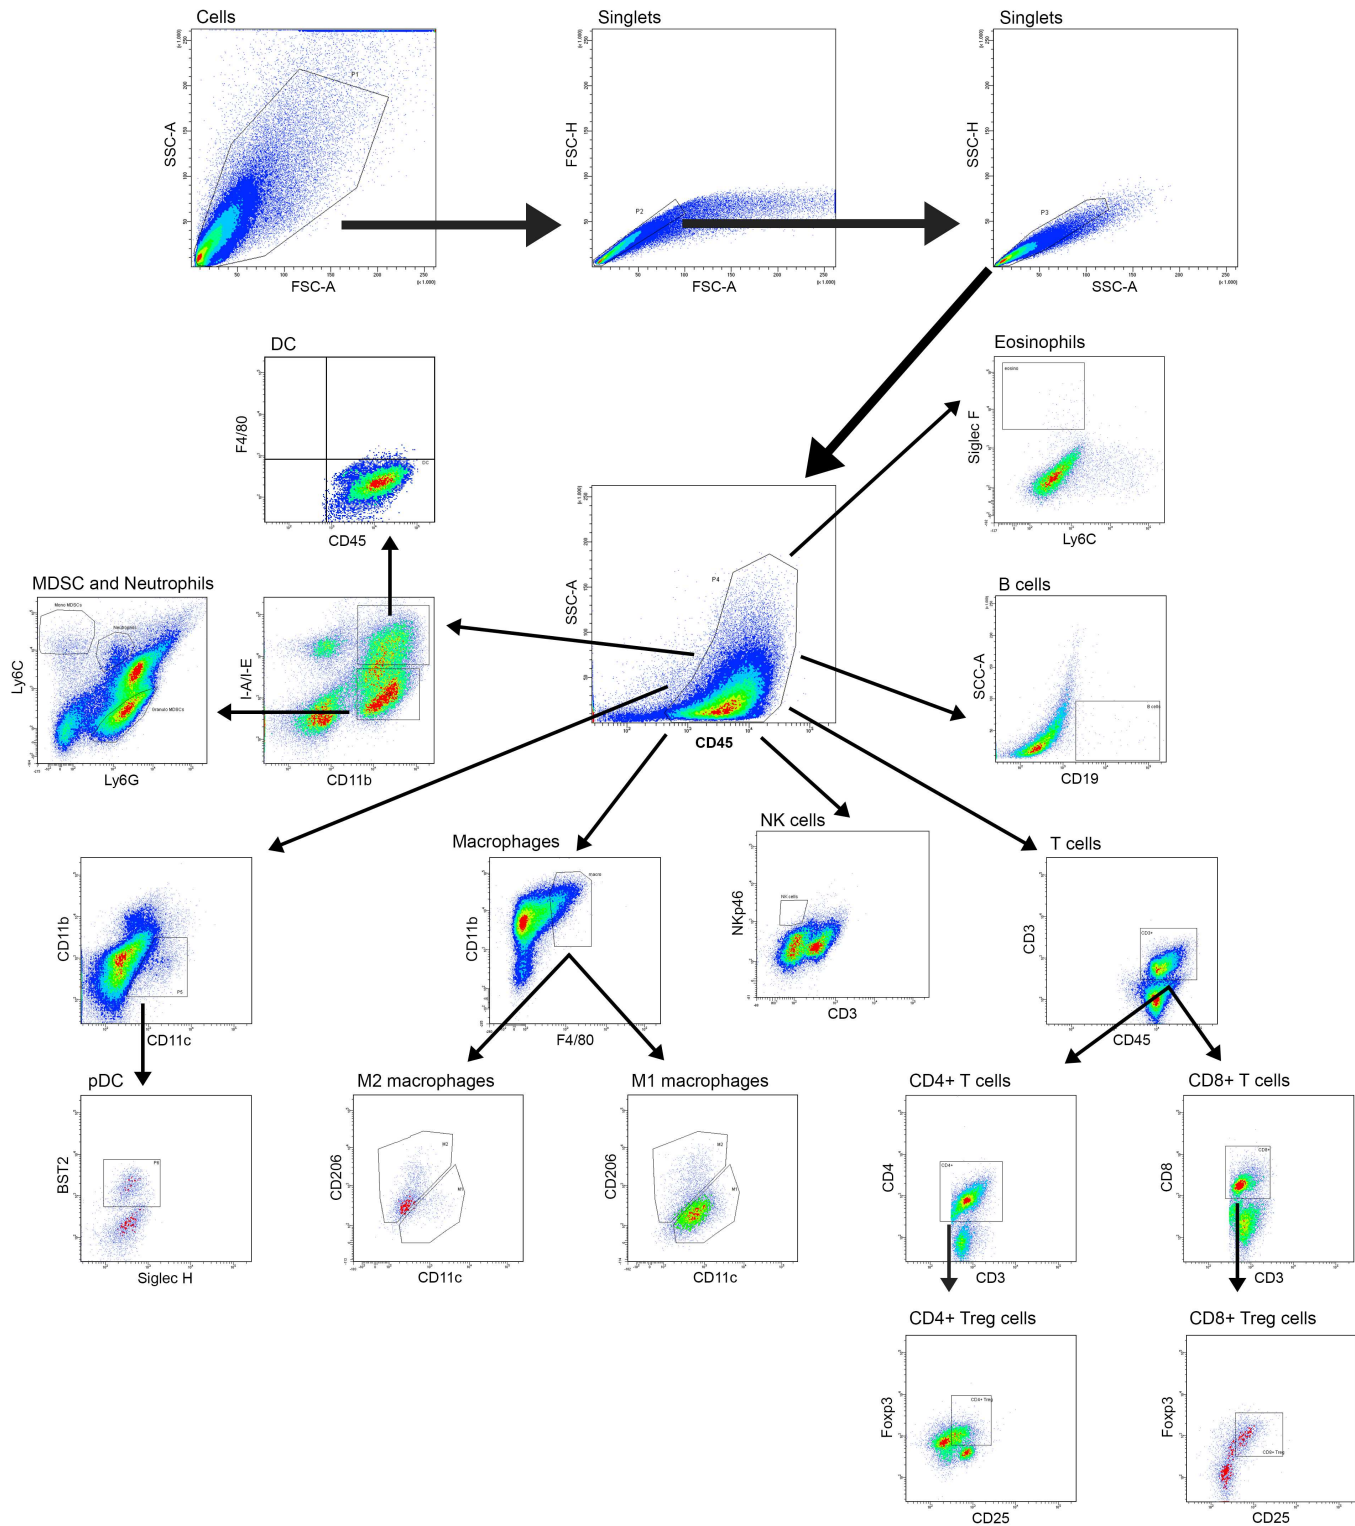

Supplement: jitc-2020-001966supp003.pdf [file jitc-2020-001966supp003.pdf]

HMGB1 expression (METABRIC) — High — Low

**Overall survival**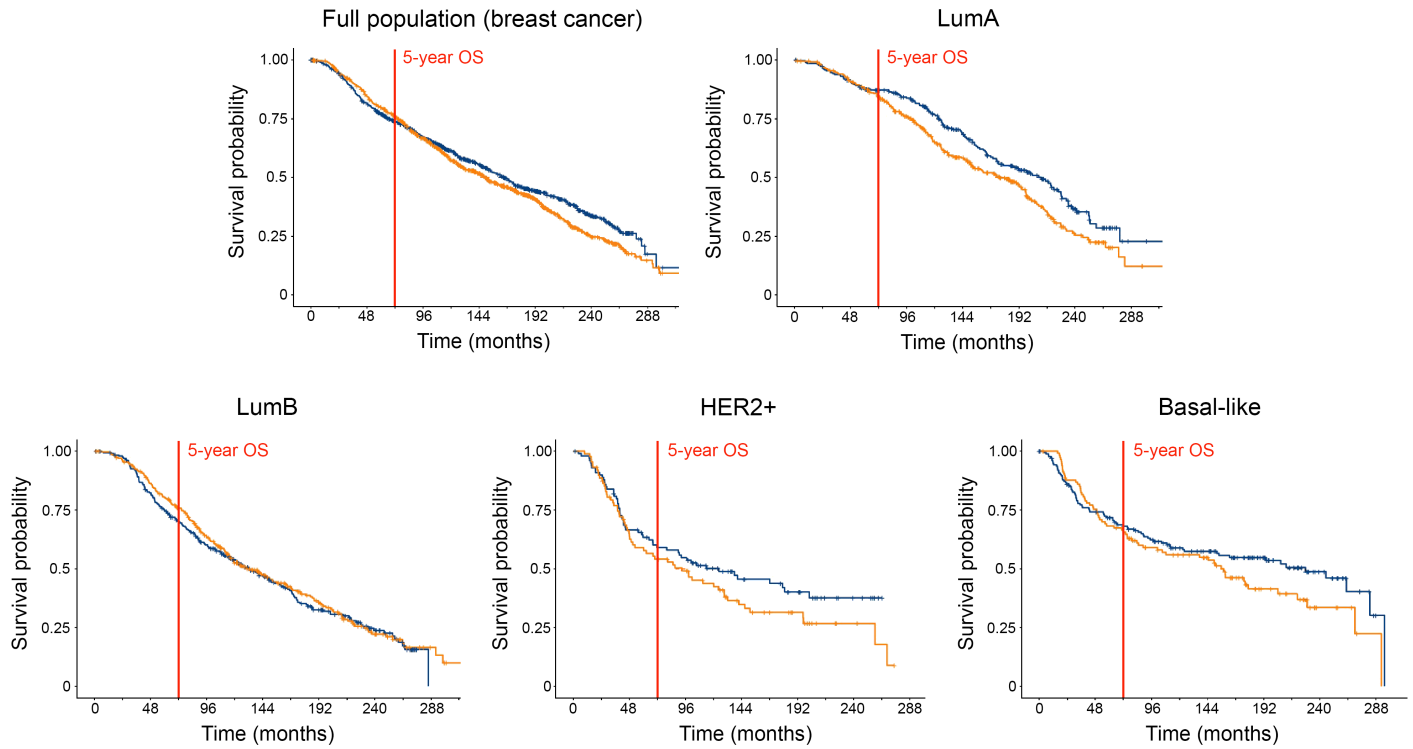**Disease-specific survival**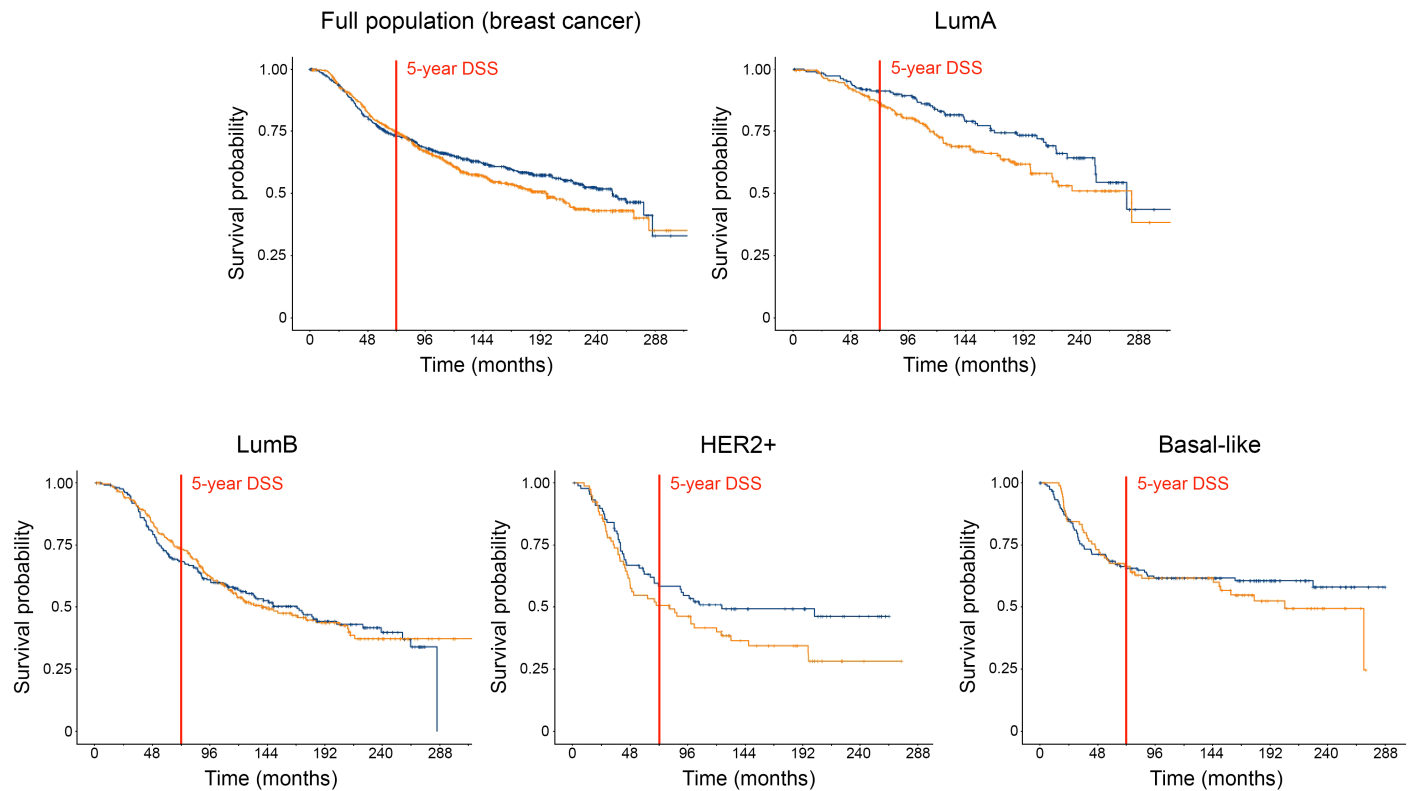

Supplement: jitc-2020-001966supp004.pdf [file jitc-2020-001966supp004.pdf]

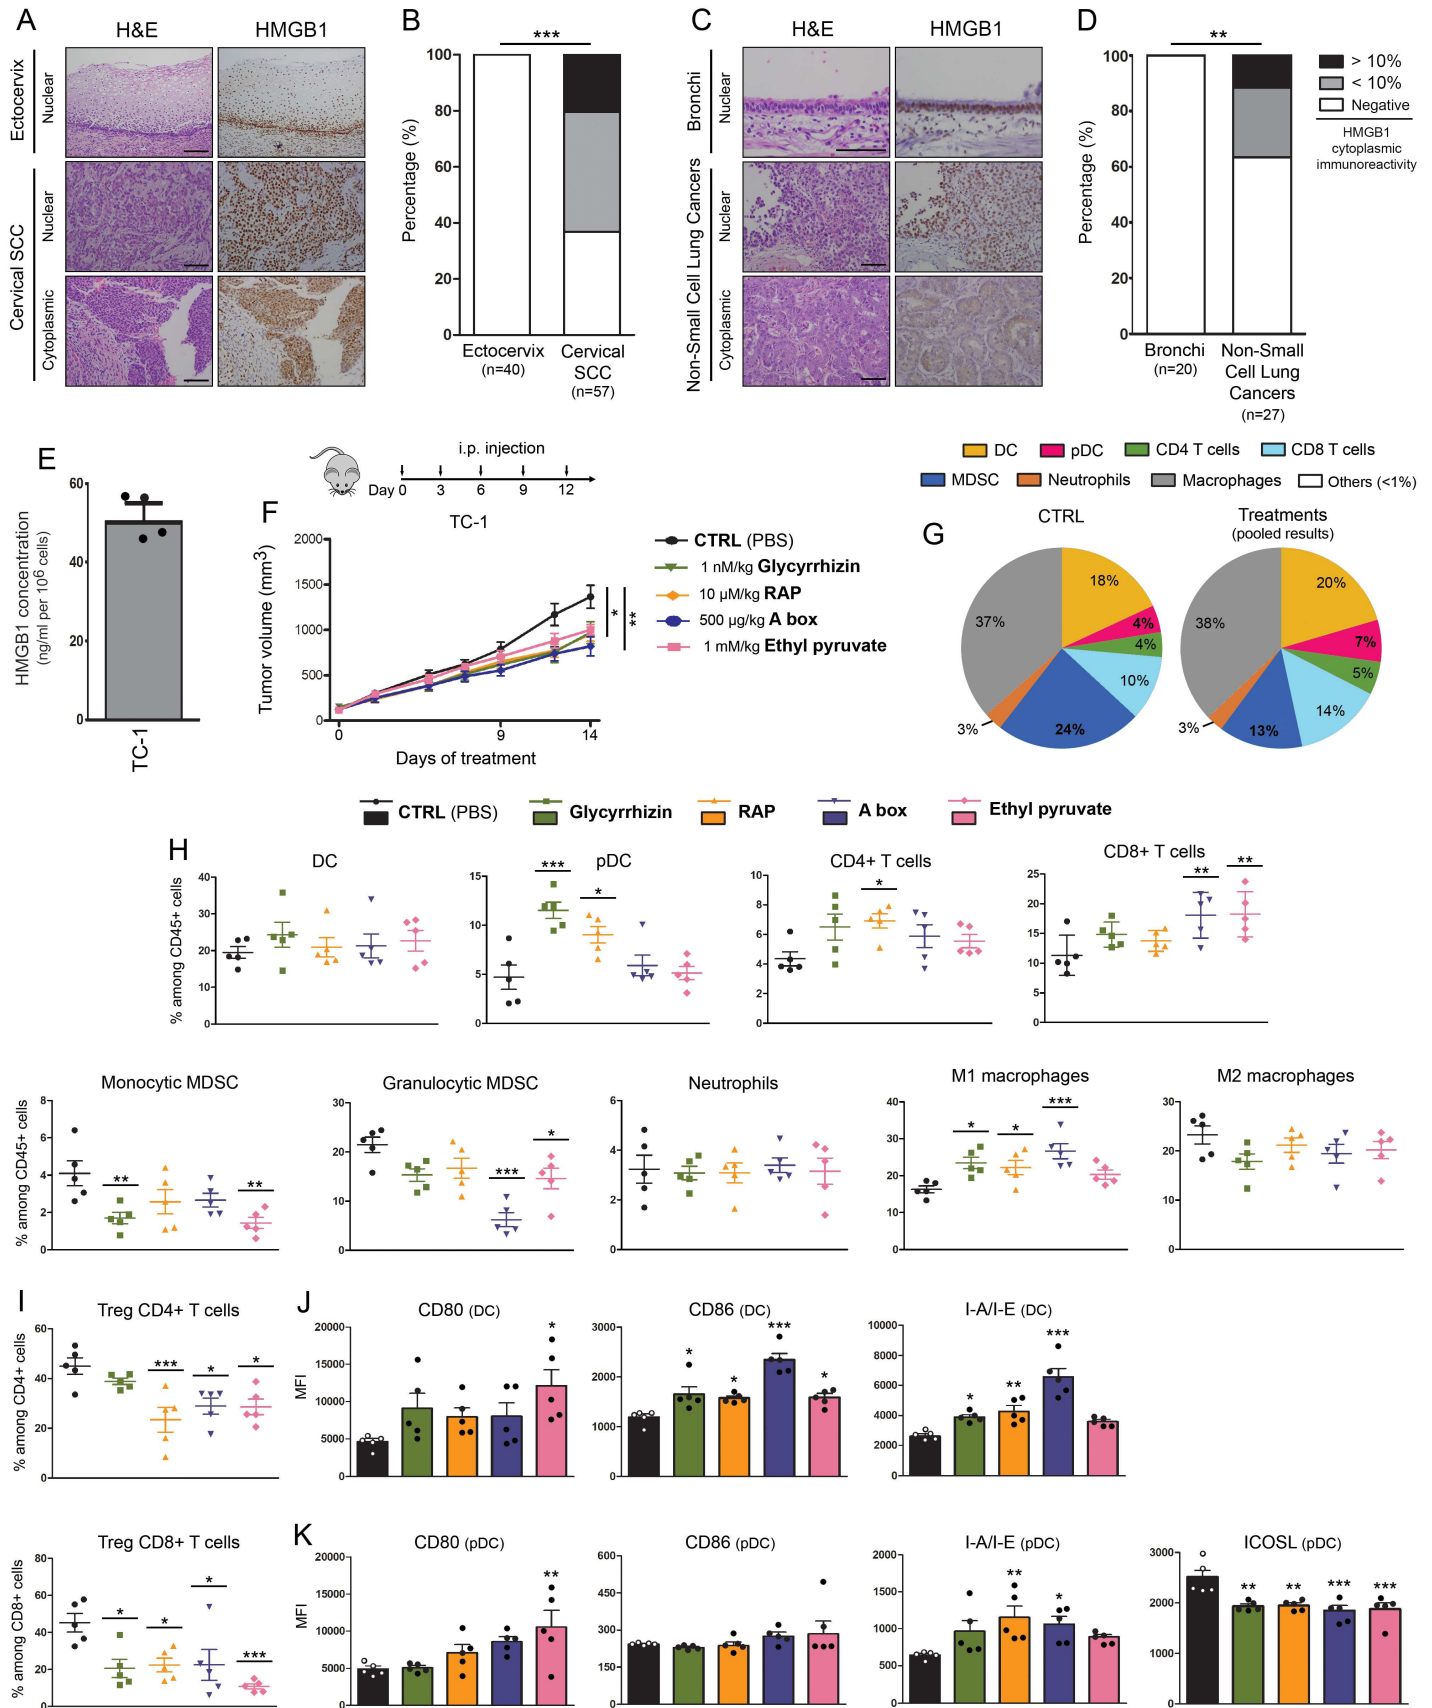

Supplement: jitc-2020-001966supp005.pdf [file jitc-2020-001966supp005.pdf]

## Triple negative breast cancer models (67NR and EpRas)

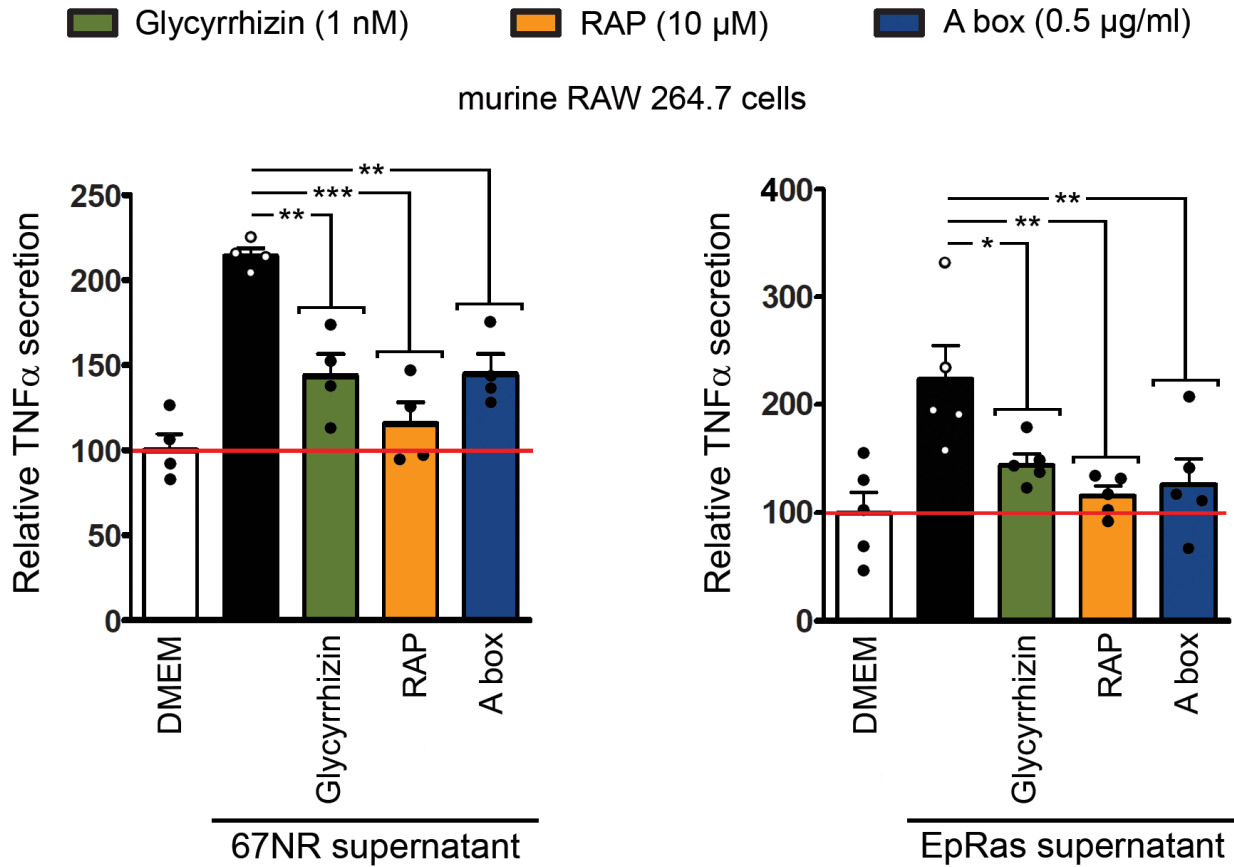

## Lung/cervical cancer model (TC-1)

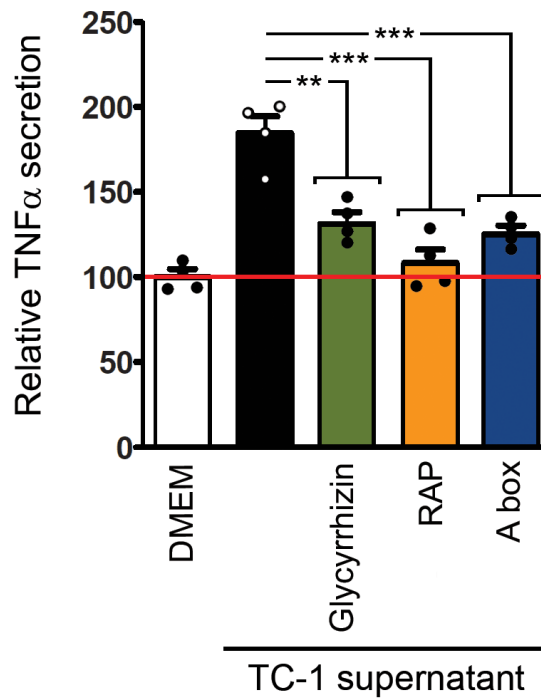

Supplement: jitc-2020-001966supp007.pdf [file jitc-2020-001966supp007.pdf]

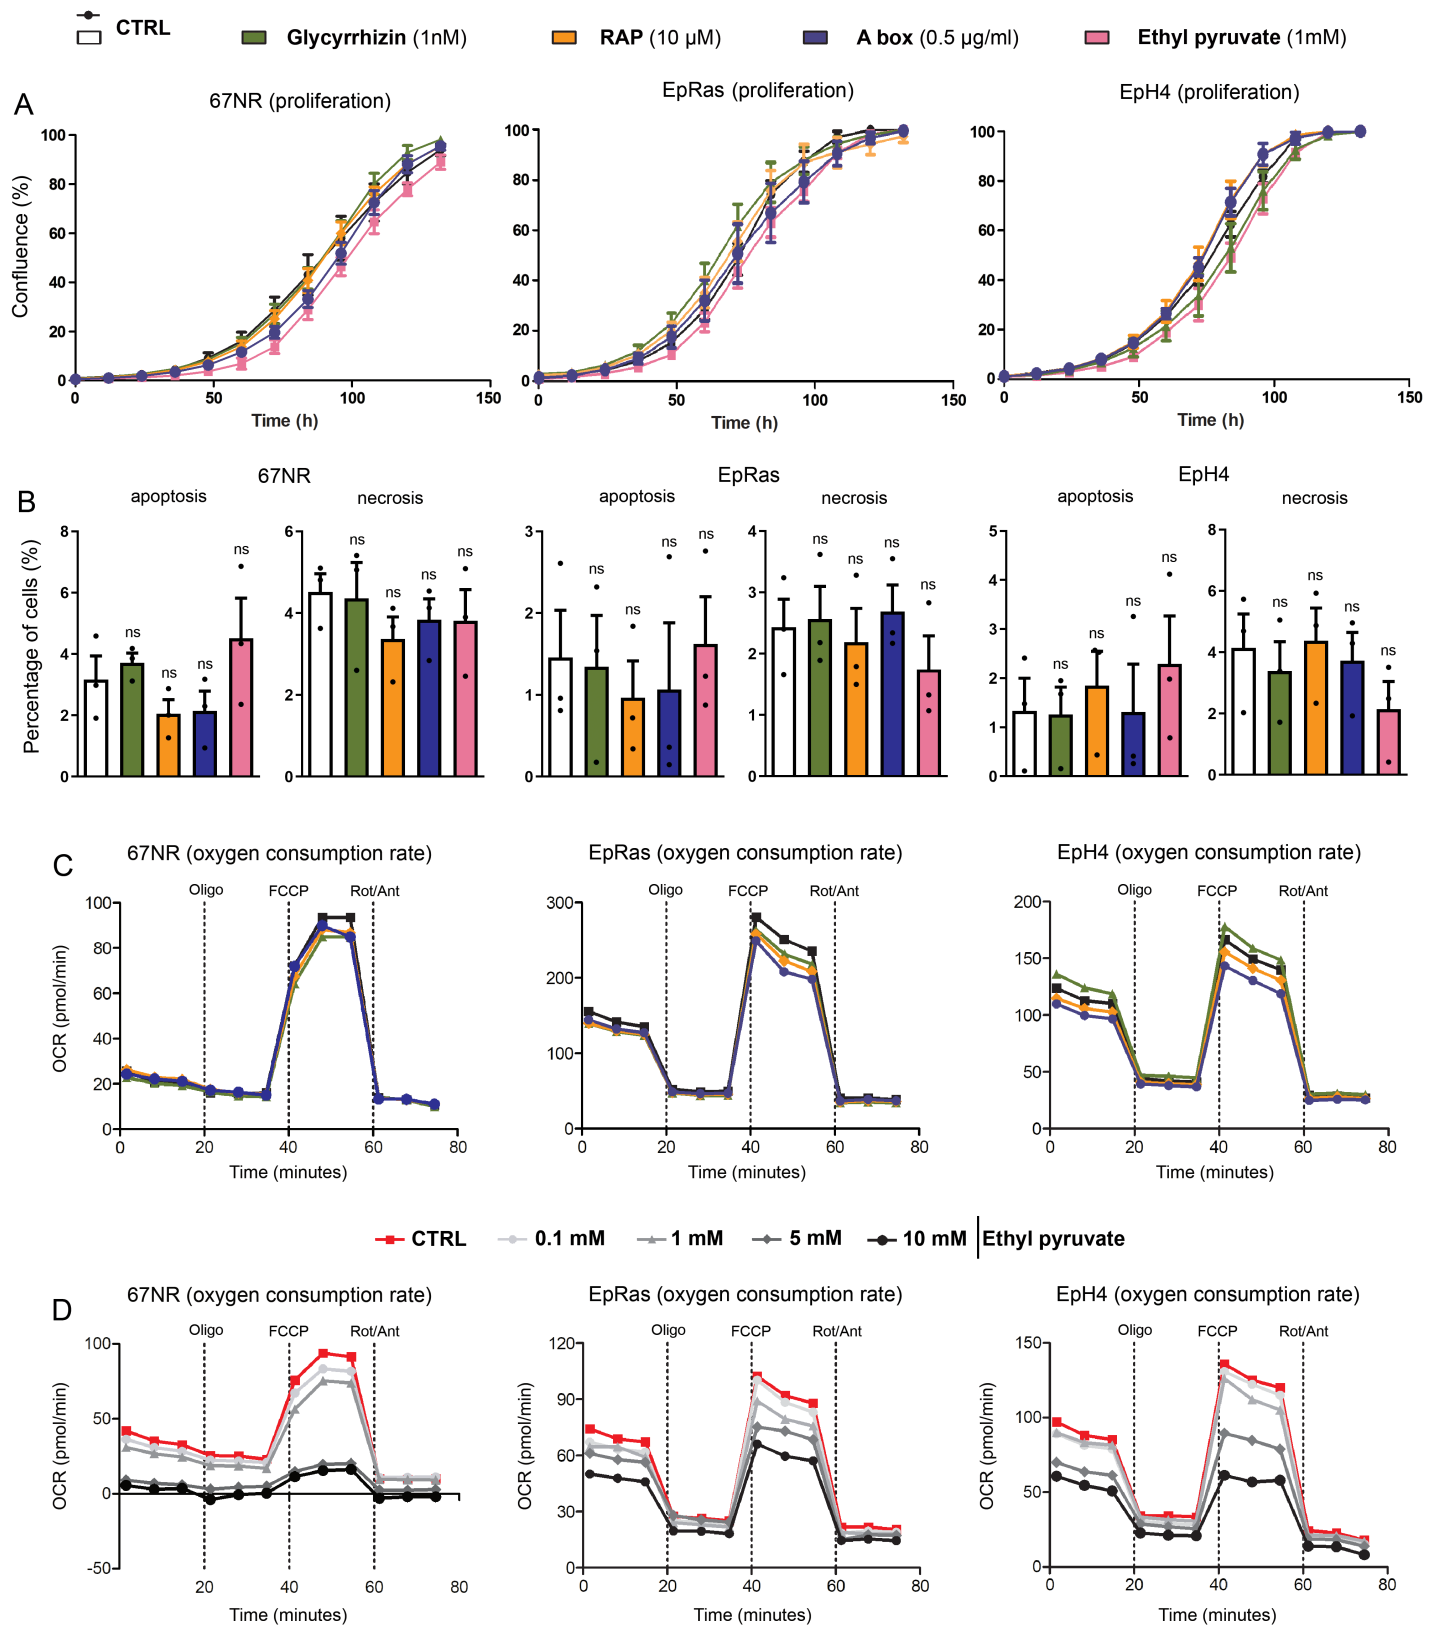

Supplement: jitc-2020-001966supp008.pdf [file jitc-2020-001966supp008.pdf]

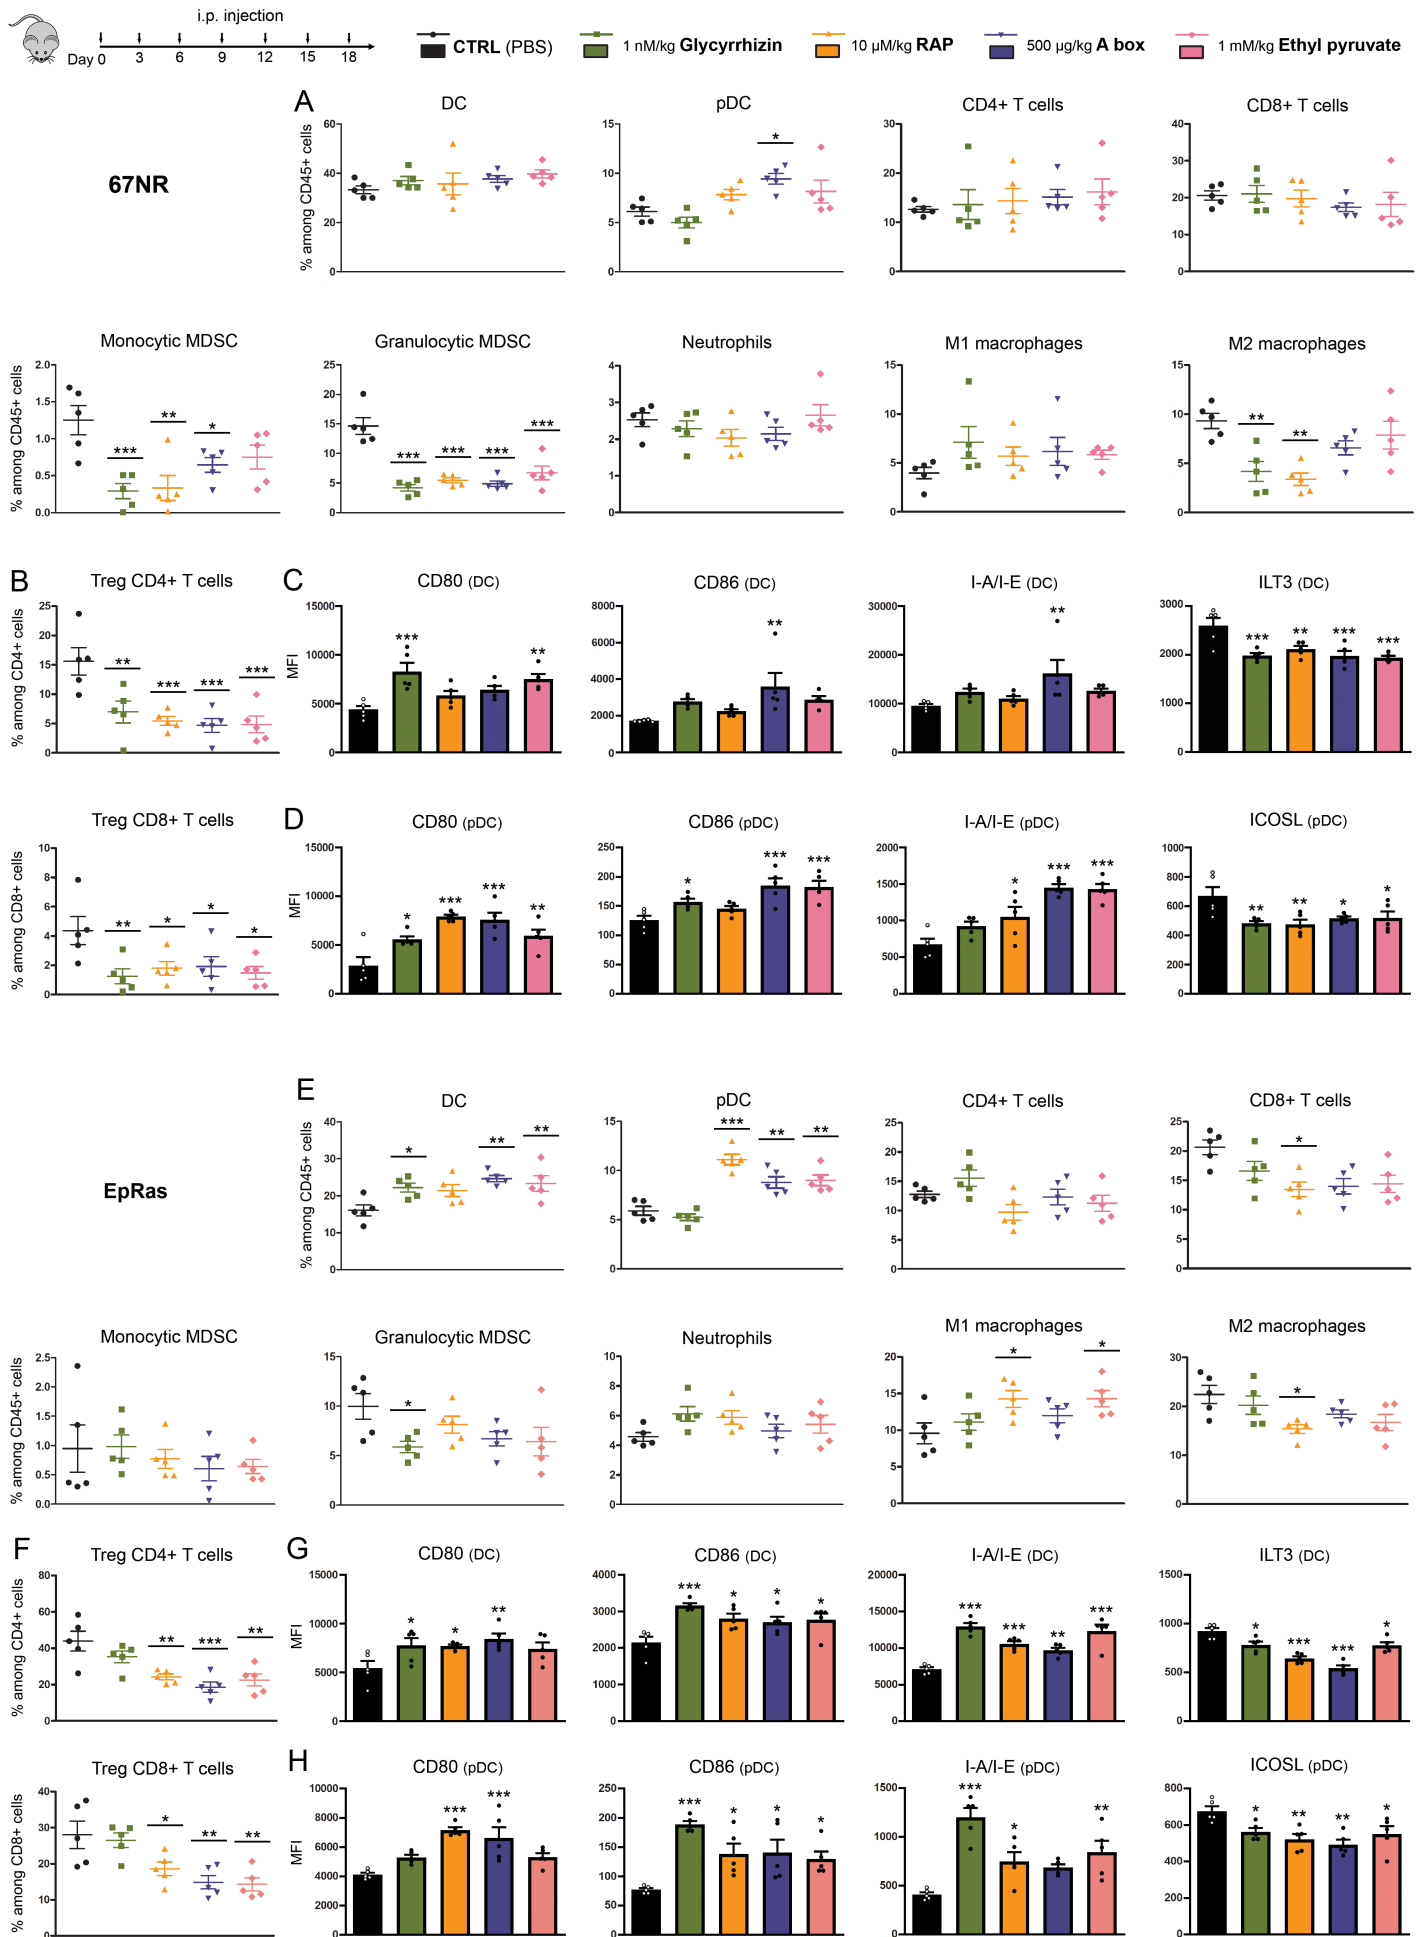

Supplement: jitc-2020-001966supp009.pdf [file jitc-2020-001966supp009.pdf]

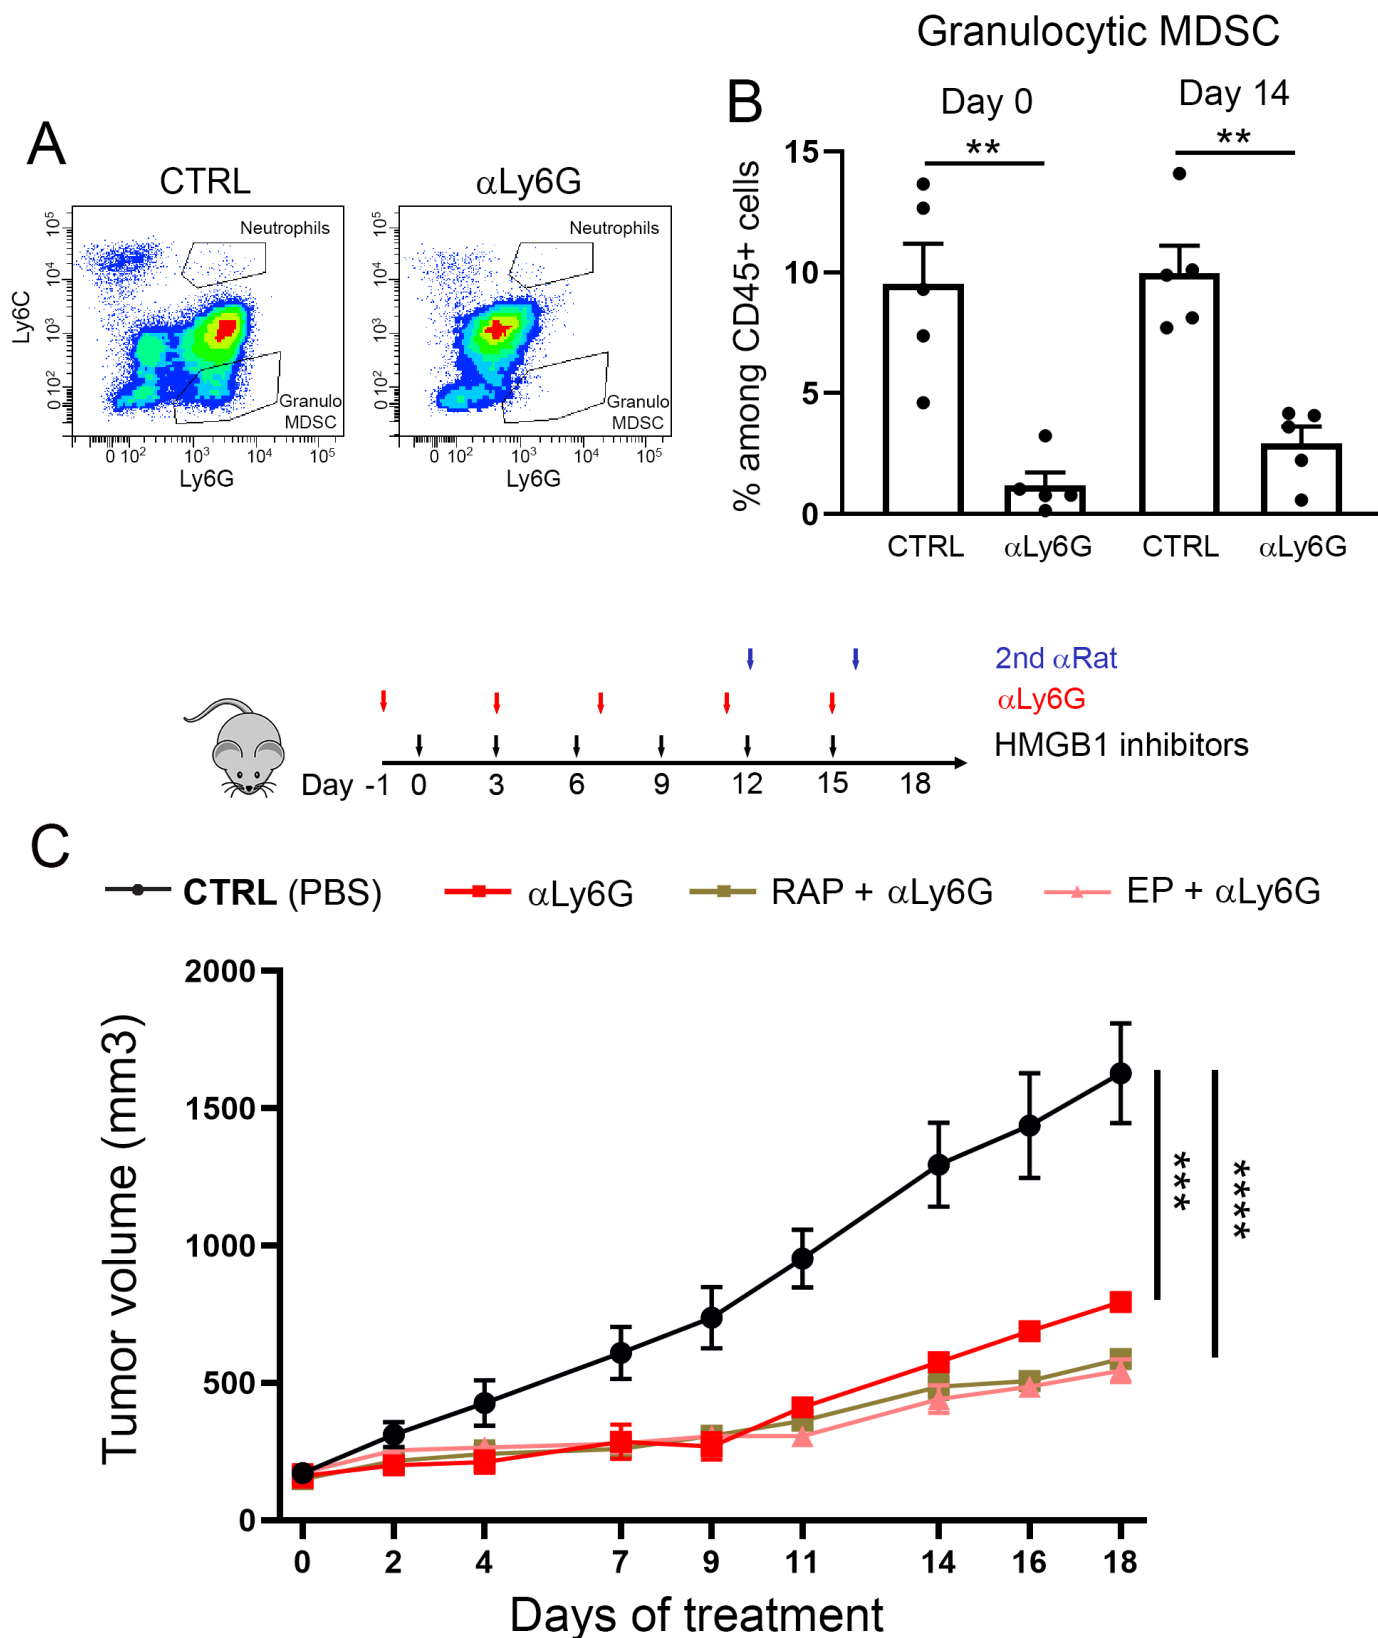

Supplement: jitc-2020-001966supp010.pdf [file jitc-2020-001966supp010.pdf]

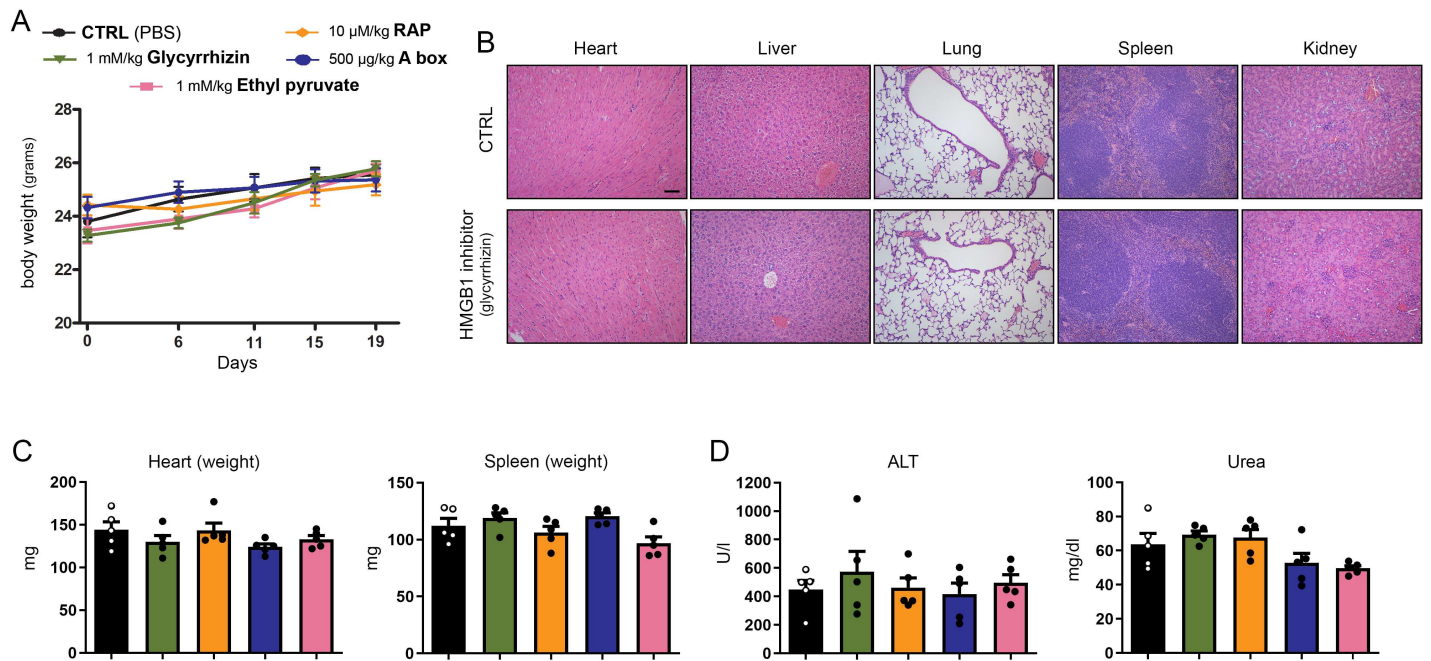

Supplement: jitc-2020-001966supp011.pdf [file jitc-2020-001966supp011.pdf]

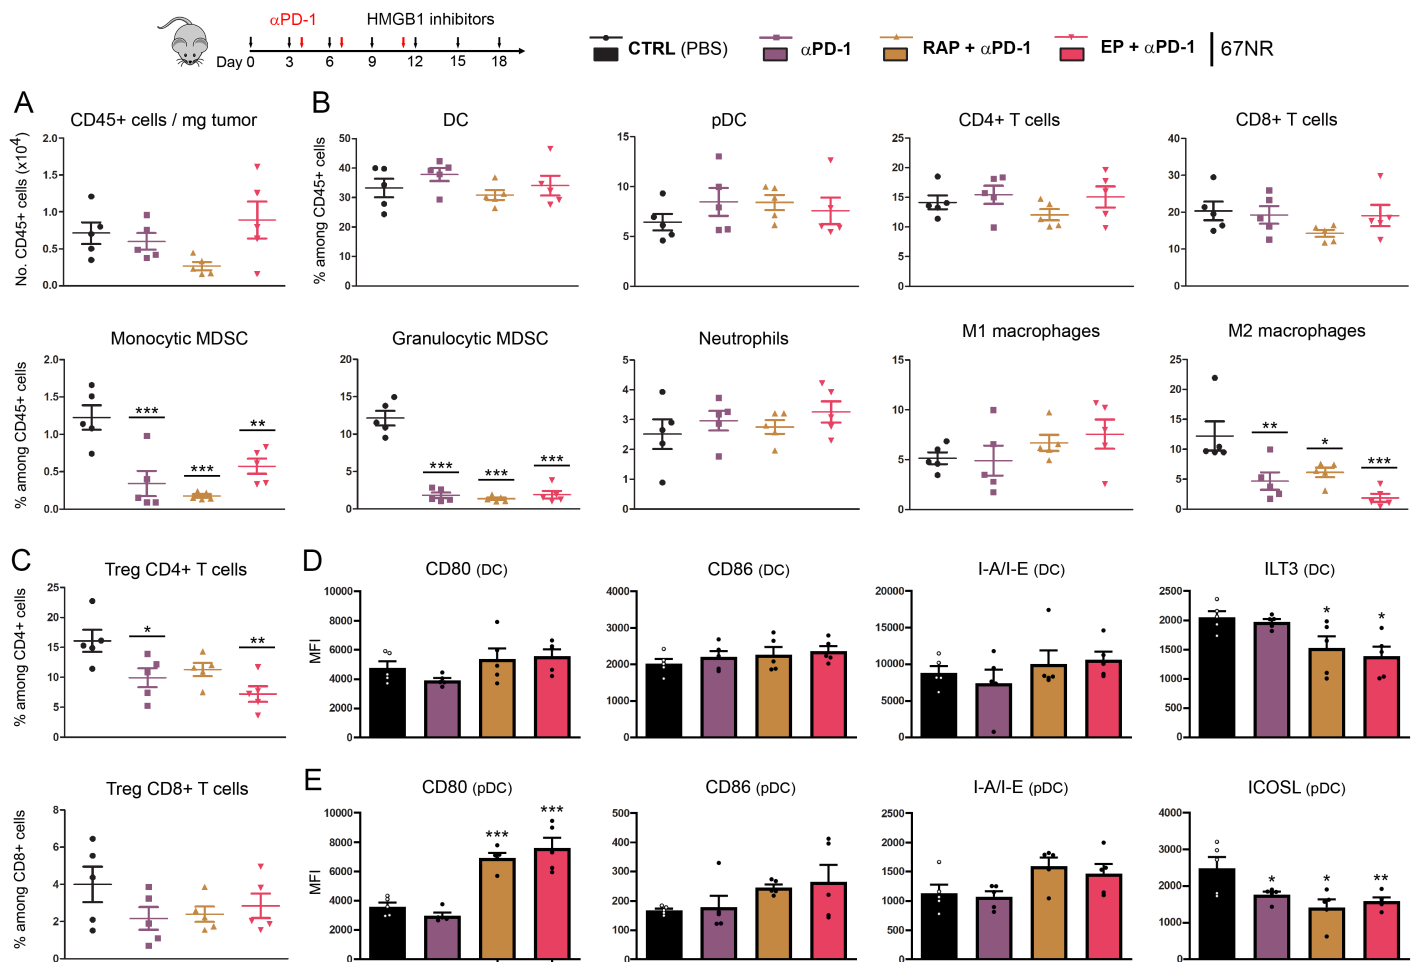

Supplement: jitc-2020-001966supp013.pdf [file jitc-2020-001966supp013.pdf]

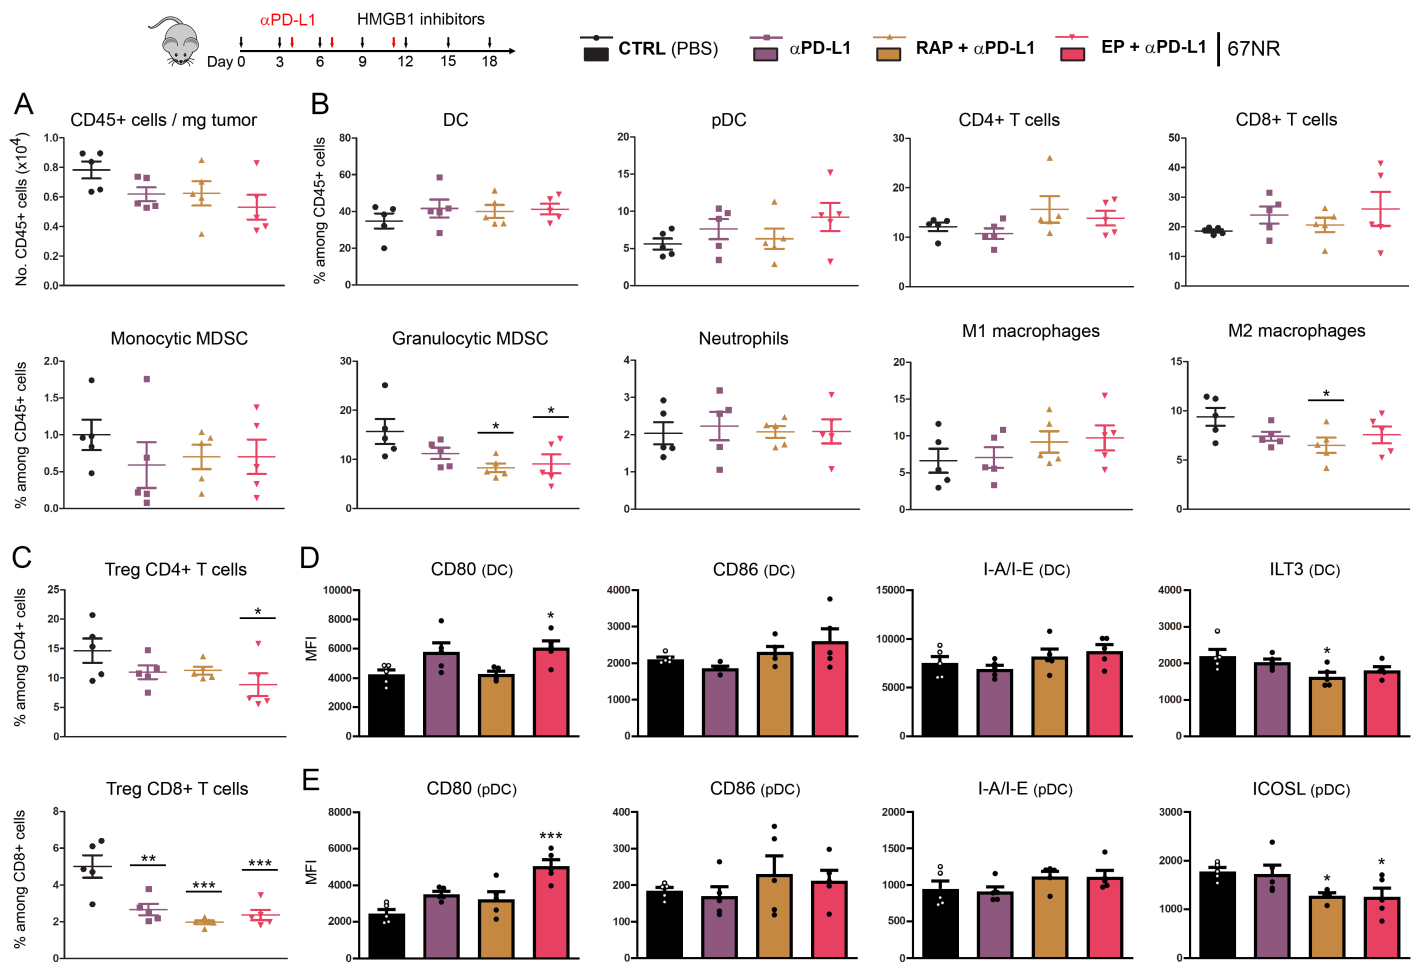

Supplement: jitc-2020-001966supp014.pdf [file jitc-2020-001966supp014.pdf]

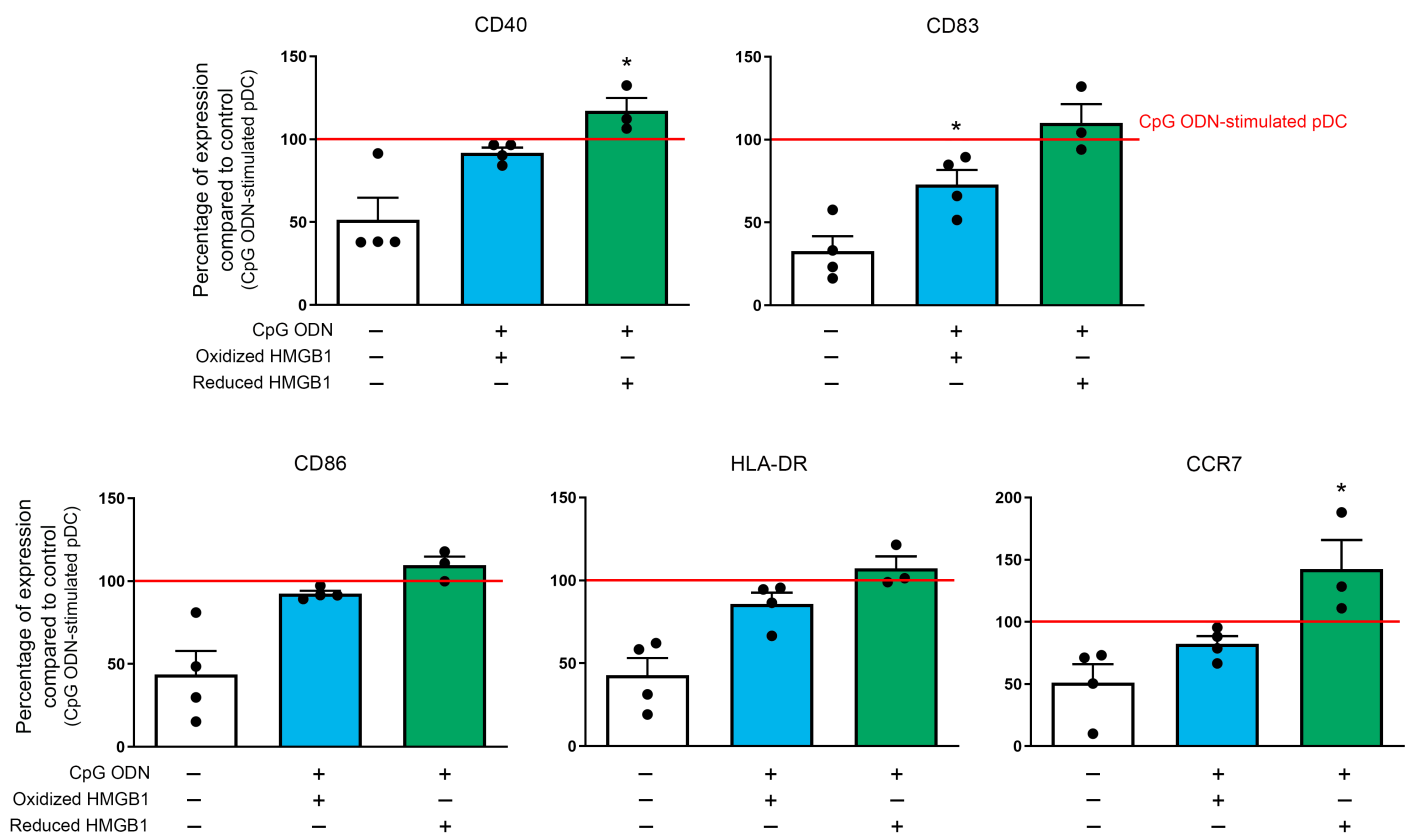

Supplement: jitc-2020-001966supp015.pdf [file jitc-2020-001966supp015.pdf]

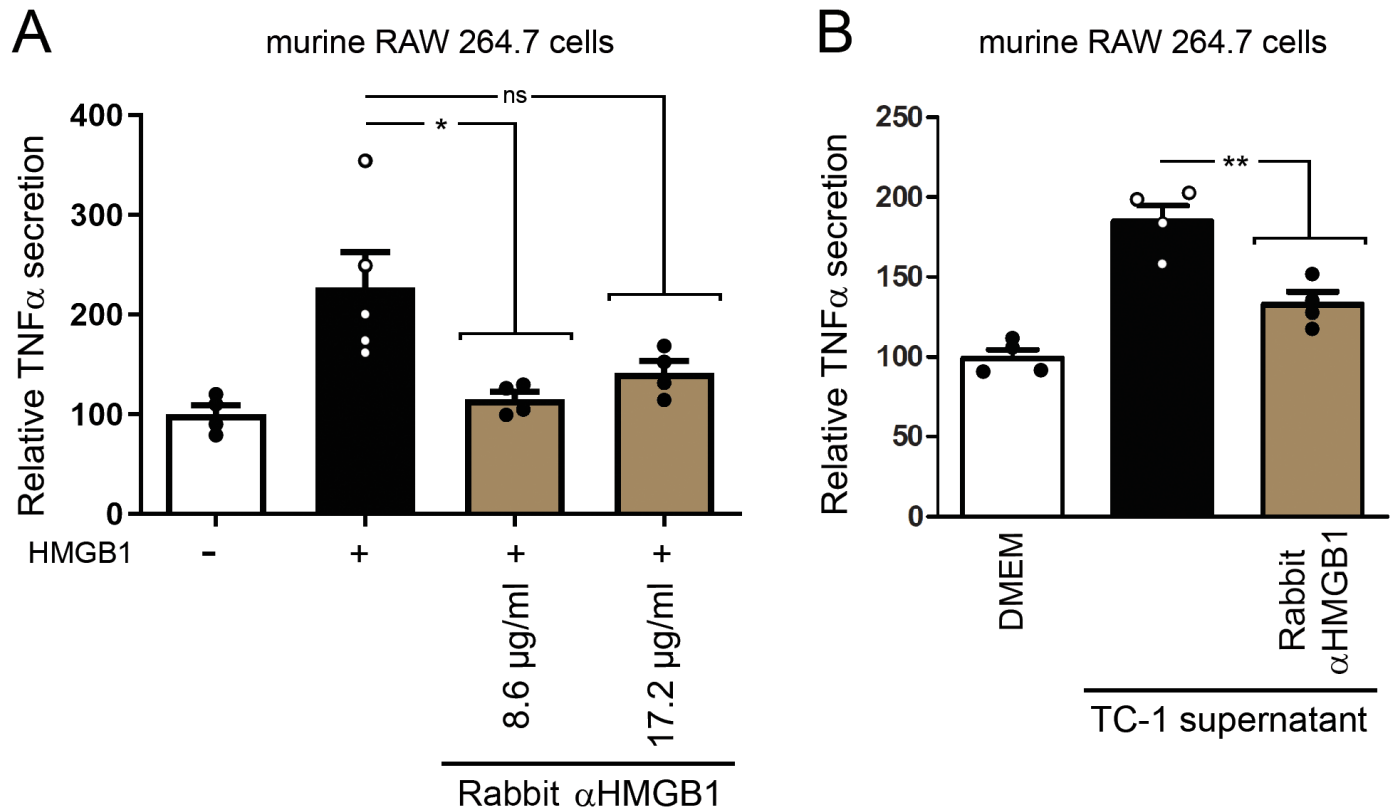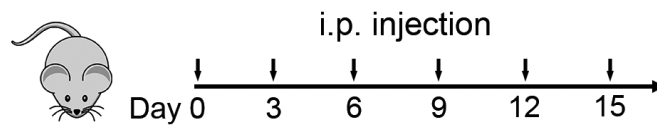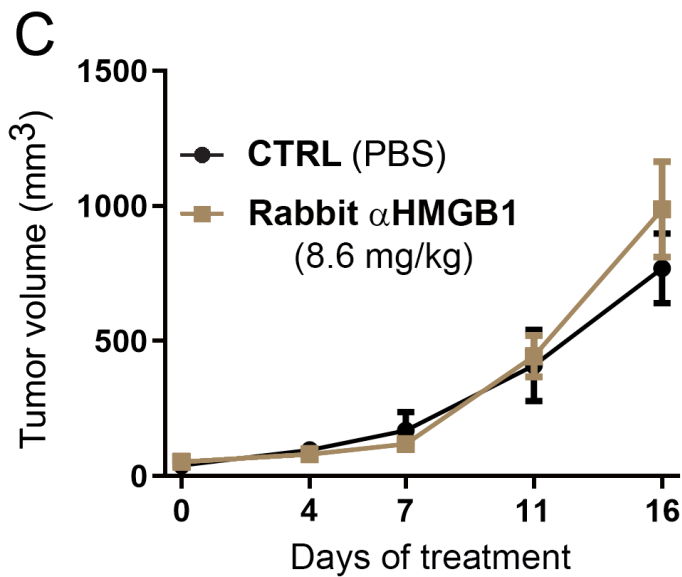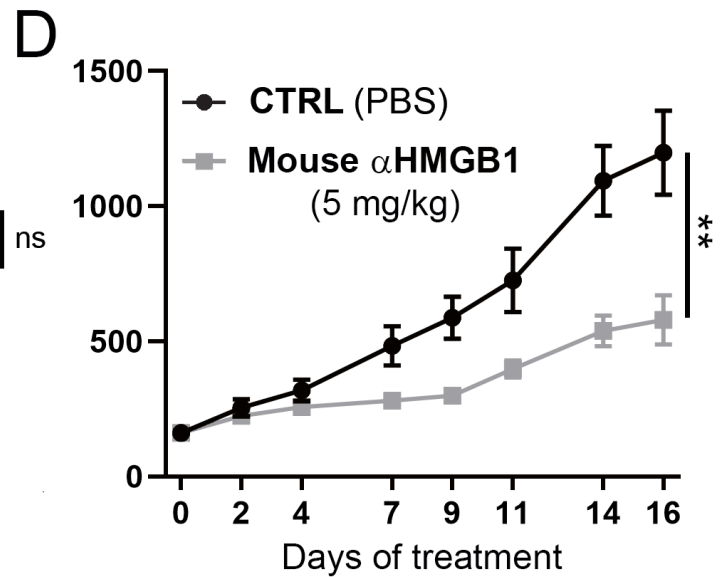

Supplement: jitc-2020-001966supp016.pdf [file jitc-2020-001966supp016.pdf]
